# Supplementary material for: Analysis of corneal nerve plexus in corneal confocal microscopy images
Source: PubMed Central journal article supplement — Neural Regen Res. 2020 Oct 9;16(4):690–1. doi: 10.4103/1673-5374.289435 (PMC8067927; doi:10.4103/1673-5374.289435), 2020-10-09
Supplement: NRR-16-690_Suppl1.pdf [file NRR-16-690_Suppl1.pdf]

## OPEN PEER REVIEW REPORT 1

**Name of journal:** Neural Regeneration Research

**Manuscript NO:** NRR-D-20-00310

**Title:** Analysis of Corneal Nerve Plexus in Corneal Confocal Microscopy Images

**Reviewer's Name:** Zhongjing Lin

**Reviewer's country:** China

**Date sent for review:** 2020-4-11

### COMMENTS TO AUTHORS

In this manuscript, the authors reviewed corneal nerve plexus using corneal confocal microscope.

-The major concern is listed as follows: When analyzing corneal nerve plexus using corneal confocal microscope, one may question its clinical significance. Analysis of corneal nerve plexus is difficult to provide useful information for treatment. It makes little sense to further check the corneal nerve plexus. There is lack of convincing citations or clinical studies.

-Scale bar or magnification were not presented in Figure 2&3.

-The format of some references (5.6.8.10) differs in terms of upper and lower case.
